# Supplementary material for: Testicular Growth and Pubertal Onset in GH-Deficient Children Treated With Growth Hormone: A Retrospective Study
Source: Frontiers journal article supplement (doi:10.3389/fendo.2021.619895), 2021-04-02
Supplement: Table_1.pdf [file Table_1.pdf]

**Supplementary Table 1.** Mean ( $\pm$ standard deviation) testicular volume measured by Prader's orchidometer in treated and untreated boys with growth hormone deficiency (GHD) and in healthy ones.

| Age (years) | n  | GHD patients after the start of therapy (ml) | n   | GHD patients before the start of therapy (ml) | n   | Healthy boys <sup>a</sup> (ml) |
|-------------|----|----------------------------------------------|-----|-----------------------------------------------|-----|--------------------------------|
| 6.5         | 1  | 1.0                                          | 1   | 2.0                                           | --- | ---                            |
| 7.0         | 1  | 2.0                                          | 2   | 2.0 (0.0)                                     | 62  | 2.03 (0.47)                    |
| 7.5         | 2  | 2.25 (0.35)                                  | 1   | 2.0                                           | --- | ---                            |
| 8.0         | 4  | 2.13 (0.25)                                  | 1   | 1.0                                           | 59  | 2.08 (0.59)                    |
| 8.5         | 5  | 2.20 (0.57)                                  | 2   | 2.25 (1.06)                                   | --- | ---                            |
| 9.0         | 8  | 2.31(0.51)                                   | 4   | 1.75 (0.50)                                   | 53  | 2.31 (1.02)                    |
| 9.5         | 8  | 2.25 (0.65)                                  | 2   | 2.13 (0.8)                                    | --- | ---                            |
| 10.0        | 10 | 2.25 (0.53)                                  | 4   | 2.25 (0.65)                                   | 49  | 2.67 (0.98)                    |
| 10.5        | 13 | 2.63 (0.55)                                  | 4   | 2.0 (0.0)*                                    | --- | ---                            |
| 11.0        | 16 | 2.72 (0.94)                                  | 8   | 2.34 (0.58)                                   | 60  | 3.48 (1.97)                    |
| 11.5        | 21 | 3.10 (1.30)                                  | 3   | 3.66 (1.60)                                   | --- | ---                            |
| 12.0        | 27 | 3.65 (1.88)                                  | 7   | 3.25 (0.84)                                   | 55  | 5.73 (3.63)                    |
| 12.5        | 26 | 4.57 (2.30)                                  | 1   | 5.0                                           | --- | ---                            |
| 13.0        | 32 | 5.68 (3.48)                                  | 4   | 3.25 (0.64)                                   | 47  | 10.16 (5.99)                   |
| 13.5        | 32 | 7.45 (3.46)                                  | 4   | 4.06 (0.82)                                   | --- | ---                            |
| 14.0        | 40 | 9.46 (4.67)                                  | 4   | 3.81(1.07)*                                   | 35  | 15 (7.02)                      |
| 14.5        | 35 | 10.80 (5.69)                                 | 2   | 3.25 (1.76)                                   | --- | ---                            |
| 15.0        | 37 | 13.30 (5.64)                                 | 2   | 4.0 (1.41)*                                   | 26  | 19.04 (5.76)                   |
| 15.5        | 37 | 15.27 (5.96)                                 | 1   | 11.0                                          | --- | ---                            |
| 16.0        | 35 | 16.46 (5.24)                                 | --- | ---                                           | 31  | 23.92 (2.8)                    |
| 16.5        | 33 | 17.98 (4.53)                                 | --- | ---                                           | --- | ---                            |
| 17.0        | 32 | 18.70 (4.08)                                 | --- | ---                                           | 27  | 24.63 (3.88)                   |
| 17.5        | 31 | 19.76(3.28)                                  | --- | ---                                           | --- | ---                            |
| 18.0        | 31 | 20.08 (3.11)                                 | --- | ---                                           | 23  | 24.41 (3.83)                   |

**Abbreviations:** n= number. <sup>a</sup>[Horm Res Paediatr 76(1), 56-64]; \* $p \leq 0.05$  vs. GHD patients after the start of therapy, Student *t*-test.

**Supplementary Table 2.** Mean ( $\pm$ standard deviation) FSH, LH, TT, and IGF1 serum levels in treated boys and before the start of therapy with growth hormone deficiency.

| Age (years) | n   | FSH after treatment (IU/l) | n   | FSH before treatment (IU/l) | n   | LH after treatment (IU/l) | n   | LH before treatment (IU/l) | n   | TT after treatment (ng/ml) | n   | TT before treatment (ng/ml) | n  | IGF1 after treatment (ng/ml) | n   | IGF1 before treatment (ng/ml) |
|-------------|-----|----------------------------|-----|-----------------------------|-----|---------------------------|-----|----------------------------|-----|----------------------------|-----|-----------------------------|----|------------------------------|-----|-------------------------------|
| 6.5         | --- | ---                        | --- | ---                         | --- | ---                       | --- | ---                        | --- | ---                        | --- | ---                         | 1  | 120.5                        | 2   | 69.45 (20.01)                 |
| 7.0         | --- | ---                        | --- | ---                         | --- | ---                       | --- | ---                        | --- | ---                        | --- | ---                         | 2  | 167.30 (43.70)               | 1   | 91.0                          |
| 7.5         | --- | ---                        | --- | ---                         | --- | ---                       | --- | ---                        | --- | ---                        | --- | ---                         | 3  | 136.10 (13.30)               | 2   | 76.5 (61.52)                  |
| 8.0         | 1   | 1.2                        | 1   | 0.3                         | 1   | 0.06                      | 1   | 0.1                        | 1   | 0.07                       | --- | ---                         | 5  | 170.12 (47.80)               | 1   | 105.0                         |
| 8.5         | --- | ---                        | --- | ---                         | --- | ---                       | --- | ---                        | --- | ---                        | --- | ---                         | 5  | 176.46 (57.24)               | 3   | 105.2 (4.88)                  |
| 9.0         | --- | ---                        | --- | ---                         | --- | ---                       | --- | ---                        | --- | ---                        | --- | ---                         | 8  | 188.18 (70.0)                | 3   | 135.13 (36.16)                |
| 9.5         | --- | ---                        | --- | ---                         | --- | ---                       | --- | ---                        | --- | ---                        | --- | ---                         | 8  | 190.09 (37.23)               | 4   | 111.25 (55.58)*               |
| 10.0        | --- | ---                        | --- | ---                         | --- | ---                       | --- | ---                        | --- | ---                        | --- | ---                         | 17 | 241.85 (110.89)              | 3   | 127.33 (26.91)                |
| 10.5        | --- | ---                        | --- | ---                         | --- | ---                       | --- | ---                        | --- | ---                        | --- | ---                         | 10 | 231.0 (57.0)                 | 5   | 141.12 (61.97)*               |
| 11.0        | 1   | 0.73                       | 2   | 0.82 (0.06)                 | 1   | 0.04                      | 2   | 0.04 (0.02)                | 1   | 0.13                       | 2   | 0.11 (0.03)                 | 20 | 245.75 (72.13)               | 7   | 164.72 (62.34)*               |
| 11.5        | 2   | 4.18 (3.50)                | --- | ---                         | 1   | 0.01                      | --- | ---                        | 1   | 3.86                       | --- | ---                         | 18 | 291.11 (108.28)              | 3   | 165.37 (37.83)*               |
| 12.0        | 5   | 1.35 (0.48)                | 2   | 1.39 (0.90)                 | 7   | 1.21 (1.36)               | 2   | 0.34 (0.37)                | 3   | 0.13 (0.01)                | 2   | 0.80 (0.11)                 | 28 | 314.25 (145.70)              | 7   | 193.33 (49.22)*               |
| 12.5        | 7   | 1.86 (1.30)                | --- | ---                         | 7   | 1.40 (1.26)               | --- | ---                        | 8   | 0.50 (0.87)                | --- | ---                         | 25 | 353.94 (119.70)              | 2   | 180.5 (14.84)*                |
| 13.0        | 8   | 2.95 (1.51)                | 3   | 2.02 (1.19)                 | 8   | 0.72 (0.30)               | 2   | 1.05 (0.35)                | 8   | 0.26 (0.27)                | 1   | 0.16                        | 31 | 349.98 (131.25)              | 5   | 131.54 (41.46)*               |
| 13.5        | 6   | 2.37 (1.33)                | 2   | 1.08 (0.31)                 | 4   | 0.72 (0.52)               | 2   | 0.36 (0.42)                | 5   | 0.54 (0.79)                | 2   | 0.31 (0.30)                 | 30 | 385.61 (128.21)              | 5   | 144.24 (23.69)*               |
| 14.0        | 14  | 1.83 (0.88)                | 2   | 2.19 (0.55)                 | 14  | 0.97 (0.44)               | 2   | 0.77 (0.52)                | 14  | 0.77 (0.65)                | 1   | 0.29                        | 38 | 423.94 (132.01)              | 4   | 142.1 (52.96)*                |
| 14.5        | 9   | 1.76 (1.38)                | --- | ---                         | 9   | 1.59 (1.12)               | --- | ---                        | 10  | 1.19 (1.41)                | --- | ---                         | 39 | 439.97 (158.72)              | --- | ---                           |
| 15.0        | 13  | 2.58 (2.21)                | 1   | 2.16                        | 14  | 1.29 (0.87)               | 1   | 0.69                       | 13  | 2.62 (2.80)                | 1   | 0.22                        | 38 | 472.57 (143.46)              | 2   | 229.1 (53.88)*                |
| 15.5        | 7   | 2.15 (1.51)                | --- | ---                         | 7   | 1.52 (1.06)               | --- | ---                        | 7   | 2.42 (1.84)                | --- | ---                         | 30 | 424.25 (129.41)              | --- | ---                           |
| 16.0        | 9   | 3.01 (2.55)                | --- | ---                         | 9   | 1.66 (1.32)               | --- | ---                        | 9   | 2.90 (2.27)                | --- | ---                         | 30 | 466.85 (111.21)              | --- | ---                           |
| 16.5        | 8   | 3.29 (1.28)                | --- | ---                         | 8   | 1.82 (0.79)               | --- | ---                        | 8   | 3.10 (2.03)                | --- | ---                         | 25 | 495.43 (141.34)              | --- | ---                           |
| 17.0        | 6   | 4.10 (1.82)                | --- | ---                         | 6   | 3.03 (1.55)               | --- | ---                        | 6   | 4.31 (1.18)                | --- | ---                         | 21 | 496.16 (148.87)              | --- | ---                           |
| 17.5        | 2   | 3.63 (2.84)                | --- | ---                         | 2   | 2.41 (0.45)               | --- | ---                        | 3   | 5.22 (0.75)                | --- | ---                         | 13 | 436.25 (61.63)               | --- | ---                           |
| 18.0        | 1   | 13.63                      | --- | ---                         | 1   | 4.03                      | --- | ---                        | 2   | 5.64 (0.96)                | --- | ---                         | 10 | 451.86 (123.48)              | --- | ---                           |

**Abbreviations:** FSH, follicle stimulating hormone; LH, luteinizing hormone; TT, total testosterone; IGF1, insulin-like growth factor 1. \*  $p \leq 0.05$  vs. Treated GHD patients, Student *t*-test.
